# Supplementary material for: Absolute and relative quantitation of amylase/trypsin-inhibitors by LC-MS/MS from wheat lines obtained by CRISPR-Cas9 and RNAi
Source: Front Plant Sci. 2022 Aug 29;13:974881. doi: 10.3389/fpls.2022.974881 (PMC9465248; doi:10.3389/fpls.2022.974881)
Supplement: Supplementary file 2 [file Table_2.xlsx]

## Sheet: 1.1 Supplementary Table 1
				Peptide Sequence
ID		Name / OS	Abbreviation	Absolute Quantitation (SIDA and LC-MS/MS)	Relative Quantitation, Ion Trap (Low Resolution)	DIA QTOF	Relative Quantitation, Orbitrap (high Resolution)		Relative Quantitation, iTRAQ (high resolution)	Blast search
							Skyline	iBAQ
P01083	IAA1_WHEAT	Alpha-amylase inhibitor 0.28 OS=Triticum aestivum	0.28					VSALTGCR		No BLAST hits
P01083	IAA1_WHEAT	Alpha-amylase inhibitor 0.28 OS=Triticum aestivum	0.28	LQCVGSQVPEAVLR	LQCVGSQVPEAVLR	LQCVGSQVPEAVLR	LQCVGSQVPEAVLR	LQCVGSQVPEAVLR		Present in 3 other proteins
P01083	IAA1_WHEAT	Alpha-amylase inhibitor 0.28 OS=Triticum aestivum	0.28			DCCQQLADINNEWCR	DCCQQLADINNEWCR	DCCQQLADINNEWCR		Present in 3 other proteins
P01083	IAA1_WHEAT	Alpha-amylase inhibitor 0.28 OS=Triticum aestivum	0.28			CGDLSSMLR	CGDLSSMLR	CGDLSSMLR		Present in 3 other proteins
P01083	IAA1_WHEAT	Alpha-amylase inhibitor 0.28 OS=Triticum aestivum	0.28			SVYQELGVR	SVYQELGVR	SVYQELGVR	SVYQELGVR	Present in 3 other proteins
P01083	IAA1_WHEAT	Alpha-amylase inhibitor 0.28 OS=Triticum aestivum	0.28	LTAASVPEVCK	LTAASVPEVCK	LTAASVPEVCK	LTAASVPEVCK	LTAASVPEVCK		Present in 3 other proteins
P01083	IAA1_WHEAT	Alpha-amylase inhibitor 0.28 OS=Triticum aestivum	0.28			VPIPNPSGDR	VPIPNPSGDR	VPIPNPSGDR		Present in 3 other proteins
P01085/P01084	IAA1_WHEAT/IAA5_WHEAT	Alpha-amylase inhibitor 0.19/0.53 OS=Triticum aestivum	0.19			SGPWMCYPGQAFQVPALPACRPLLR		SGPWMCYPGQAFQVPALPACRPLLR		Present in 3 other proteins
P01085/P01084	IAA1_WHEAT/IAA5_WHEAT	Alpha-amylase inhibitor 0.19/0.53 OS=Triticum aestivum	0.19+0.53	LQCNGSQVPEAVLR	LQCNGSQVPEAVLR	LQCNGSQVPEAVLR		LQCNGSQVPEAVLR		Present in 0.19 and 0.53 and in 12 other proteins
P01085	IAA1_WHEAT	Alpha-amylase inhibitor 0.19 OS=Triticum aestivum	0.19		DCCQQLAHISEWCR	DCCQQLAHISEWCR	DCCQQLAHISEWCR	DCCQQLAHISEWCR		Present in 4 other proteins
P01085/P01084	IAA1_WHEAT/IAA5_WHEAT	Alpha-amylase inhibitor 0.19/0.53 OS=Triticum aestivum	0.19+0.53			CGALYSMLDSMYK		CGALYSMLDSMYK		Present in 0.19 and 0.53 and in 11 other proteins
P01085	IAA1_WHEAT	Alpha-amylase inhibitor 0.19 OS=Triticum aestivum	0.19		EHGAQEGQAGTGAFPR		EHGAQEGQAGTGAFPR	EHGAQEGQAGTGAFPR	EHGAQEGQAGTGAFPR	Present in 5 other proteins
P01085/P01084	IAA1_WHEAT/IAA5_WHEAT	Alpha-amylase inhibitor 0.19/0.53 OS=Triticum aestivum	0.19+0.53	LTAASITAVCR	LTAASITAVCR	LTAASITAVCR		LTAASITAVCR		Present in 0.19 and 0.53 and in 11 other proteins
P01085/P01084	IAA1_WHEAT/IAA5_WHEAT	Alpha-amylase inhibitor 0.19/0.53 OS=Triticum aestivum	0.19+0.53			LPIVVDASGDGAYVCK		LPIVVDASGDGAYVCK		Present in 0.19 and 0.53 and in 9 other proteins
P01085/P01084	IAA1_WHEAT/IAA5_WHEAT	Alpha-amylase inhibitor 0.19/0.53 OS=Triticum aestivum	0.19+0.53					DVAAYPDA	DVAAYPDA	No BLAST hits
P01084/P01085	IAA5_WHEAT/IAA1_WHEAT	Alpha-amylase inhibitor 0.53/0.19 OS=Triticum aestivum	0.53			SGPWMCYPGQAFQVPALPGCRPLLK		SGPWMCYPGQAFQVPALPGCRPLLK		Present in 3 other proteins
P01084/P01085	IAA5_WHEAT/IAA1_WHEAT	Alpha-amylase inhibitor 0.53/0.19 OS=Triticum aestivum	0.53+0.19			LQCNGSQVPEAVLR		LQCNGSQVPEAVLR		Present in 0.19 and 0.53 and in 12 other proteins
P01084/P01085	IAA5_WHEAT/IAA1_WHEAT	Alpha-amylase inhibitor 0.53/0.19 OS=Triticum aestivum	0.53+0.19			CGALYSMLDSMYK		CGALYSMLDSMYK		Present in 0.19 and 0.53 and in 11 other proteins
P01084	IAA5_WHEAT	Alpha-amylase inhibitor 0.53 OS=Triticum aestivum	0.53	EHGVSEGQAGTGAFPSCR	EHGVSEGQAGTGAFPSCR		EHGVSEGQAGTGAFPSCR	EHGVSEGQAGTGAFPSCR		Present in 3 other proteins
P01084/P01085	IAA5_WHEAT/IAA1_WHEAT	Alpha-amylase inhibitor 0.53/0.19 OS=Triticum aestivum	0.53+0.19			LTAASITAVCR		LTAASITAVCR		Present in 0.19 and 0.53 and in 11 other proteins
P01084/P01085	IAA5_WHEAT/IAA1_WHEAT	Alpha-amylase inhibitor 0.53/0.19 OS=Triticum aestivum	0.53+0.19			LPIVVDASGDGAYVCK		LPIVVDASGDGAYVCK		Present in 0.19 and 0.53 and in 9 other proteins
P01084/P01085	IAA5_WHEAT/IAA1_WHEAT	Alpha-amylase inhibitor 0.53/0.19 OS=Triticum aestivum	0.53+0.19					DVAAYPDA		No BLAST hits
P16850	IAAC1_WHEAT	Alpha-amylase/trypsin inhibitor CM1	CM1			EYVAQQTCGISISGSAVSTEPGNTPR		EYVAQQTCGISISGSAVSTEPGNTPR	EYVAQQTCGISISGSAVSTEPGNTPR	Present in 2 other proteins
P16850	IAAC1_WHEAT	Alpha-amylase/trypsin inhibitor CM1	CM1					ELYDASQHCR		Present in CM1 and CM2 and in 3 other proteins
P16850	IAAC1_WHEAT	Alpha-amylase/trypsin inhibitor CM1	CM1	SDPNSSVLK	SDPNSSVLK		SDPNSSVLK	SDPNSSVLK	SDPNSSVLK	Present in 2 other proteins
P16851	IAAC2_WHEAT	Alpha-amylase/trypsin inhibitor CM2 OS=Triticum aestivum	CM2	EYVAQQTCGVGIVGSPVSTEPGNTPR	EYVAQQTCGVGIVGSPVSTEPGNTPR	EYVAQQTCGVGIVGSPVSTEPGNTPR		EYVAQQTCGVGIVGSPVSTEPGNTPR		Present in 1 other protein
P16851	IAAC2_WHEAT	Alpha-amylase/trypsin inhibitor CM2 OS=Triticum aestivum	CM2					ELYDASQHCR		Present in CM1 and CM2 and in 3 other proteins
P16851	IAAC2_WHEAT	Alpha-amylase/trypsin inhibitor CM2 OS=Triticum aestivum	CM2	TSDPNSGVLK	TSDPNSGVLK	TSDPNSGVLKDLPGCPREPQR	TSDPNSGVLK	TSDPNSGVLK	TSDPNSGVLK	Present in 1 other protein
P16851	IAAC2_WHEAT	Alpha-amylase/trypsin inhibitor CM2 OS=Triticum aestivum	CM2			VLVTPGHCNVMTVHNTPYCLGLDI				Present in 1 other protein
P17314	IAAC3_WHEAT	Alpha-amylase/trypsin inhibitor CM3 OS=Triticum aestivum	CM3					TNLLPHCR		Present in 2 other proteins (one non-Triticum)
P17314	IAAC3_WHEAT	Alpha-amylase/trypsin inhibitor CM3 OS=Triticum aestivum	CM3			DYVLQQTCGTFTPGSK	DYVLQQTCGTFTPGSK	DYVLQQTCGTFTPGSK		Present in 3 other proteins
P17314	IAAC3_WHEAT	Alpha-amylase/trypsin inhibitor CM3 OS=Triticum aestivum	CM3			LPEWMTSASIYSPGKPYLAK		LPEWMTSASIYSPGKPYLAK	LPEWMTSASIYSPGKPYLAK	Present in 1 other protein
P17314	IAAC3_WHEAT	Alpha-amylase/trypsin inhibitor CM3 OS=Triticum aestivum	CM3			LYCCQELAEISQQCR	LYCCQELAEISQQCR	LYCCQELAEISQQCR		Present in 1 other protein
P17314	IAAC3_WHEAT	Alpha-amylase/trypsin inhibitor CM3 OS=Triticum aestivum	CM3	YFIALPVPSQPVDPR	YFIALPVPSQPVDPR	YFIALPVPSQPVDPR	YFIALPVPSQPVDPR	YFIALPVPSQPVDPR	YFIALPVPSQPVDPR	Present in 3 other proteins
P17314	IAAC3_WHEAT	Alpha-amylase/trypsin inhibitor CM3 OS=Triticum aestivum	CM3	SGNVGESGLIDLPGCPR	SGNVGESGLIDLPGCPR	SGNVGESGLIDLPGCPR	SGNVGESGLIDLPGCPR	SGNVGESGLIDLPGCPR		Present in 3 other proteins
P17314	IAAC3_WHEAT	Alpha-amylase/trypsin inhibitor CM3 OS=Triticum aestivum	CM3			EMQWDFVR		EMQWDFVR	EMQWDFVR	Present in 1 other protein
P17314	IAAC3_WHEAT	Alpha-amylase/trypsin inhibitor CM3 OS=Triticum aestivum	CM3			LLVAPGQCNLATIHNVR	LLVAPGQCNLATIHNVR	LLVAPGQCNLATIHNVR		Present in barley CMd and in 4 other proteins
P17314	IAAC3_WHEAT	Alpha-amylase/trypsin inhibitor CM3 OS=Triticum aestivum	CM3					YCPAVEQPLWI		Present in barley CMd and in 2 other proteins
P16159	IAC16_WHEAT	Alpha-amylase/trypsin inhibitor CM16 OS=Triticum aestivum	CM16	DYVEQQACR	DYVEQQACR		DYVEQQACR	DYVEQQACR		Present in barley CMb and in 2 other proteins
P16159	IAC16_WHEAT	Alpha-amylase/trypsin inhibitor CM16 OS=Triticum aestivum	CM16			IETPGSPYLAK	IETPGSPYLAK	IETPGSPYLAK	IETPGSPYLAK	Present in 1 other protein
P16159	IAC16_WHEAT	Alpha-amylase/trypsin inhibitor CM16 OS=Triticum aestivum	CM16	QQCCGELANIPQQCR	QQCCGELANIPQQCR	QQCCGELANIPQQCR	QQCCGELANIPQQCR	QQCCGELANIPQQCR		Present in barley CMb and in 2 other proteins
P16159/Q41540	IAC16_WHEAT/Q41540_WHEAT	Alpha-amylase/trypsin inhibitor CM16/CM17 OS=Triticum aestivum	CM16			SRPDQSGLMELPGCPR		SRPDQSGLMELPGCPR		Present in CM16, CM17, barlex CMb and in 4 other proteins
P16159	IAC16_WHEAT	Alpha-amylase/trypsin inhibitor CM16 OS=Triticum aestivum	CM16			EVQMDFVR	EVQMDFVR	EVQMDFVR	EVQMDFVR	Present in barley CMb and in 2 other proteins
P16159	IAC16_WHEAT	Alpha-amylase/trypsin inhibitor CM16 OS=Triticum aestivum	CM16			ILVTPGYCNLTTVHNTPYCLAMEESQWS				Present in 1 other protein
Q41540	Q41540_WHEAT	Alpha-amylase/trypsin inhibitor CM17 OS=Triticum aestivum	CM17	NYVEEQACR			NYVEEQACR	NYVEEQACR		Present in 4 other proteins
Q41540	Q41540_WHEAT	Alpha-amylase/trypsin inhibitor CM17 OS=Triticum aestivum	CM17		IEMPGPPYLAK	IEMPGPPYLAK	IEMPGPPYLAK	IEMPGPPYLAK	IEMPGPPYLAK	Present in barley CMb and in 4 other proteins
Q41540	Q41540_WHEAT	Alpha-amylase/trypsin inhibitor CM17 OS=Triticum aestivum	CM17				QECCEQLANIPQQCR	QECCEQLANIPQQCR		Present in 2 other proteins
Q41540/P16159	Q41540_WHEAT/IAC16_WHEAT	Alpha-amylase/trypsin inhibitor CM17/CM16 OS=Triticum aestivum	CM17+CM16			SRPDQSGLMELPGCPR		SRPDQSGLMELPGCPR		Present in CM16, CM17, barlex CMb and in 4 other proteins
Q41540/P16159	Q41540_WHEAT/IAC16_WHEAT	Alpha-amylase/trypsin inhibitor CM17/CM16 OS=Triticum aestivum	CM17+CM16			EVQMNFVPILVTPGYCNLTTVHNTPYCLGMEESQWS				Present in 1 other protein
P16347	IAAS_WHEAT	Endogenous alpha-amylase/subtilisin inhibitor OS=Triticum aestivum	WASI					DPPPVHDTDGNELR	DPPPVHDTDGNELR	Present in 5 other proteins
P16347	IAAS_WHEAT	Endogenous alpha-amylase/subtilisin inhibitor OS=Triticum aestivum	WASI		ADANYYVLPANR		ADANYYVLPANR	ADANYYVLPANR	ADANYYVLPANR	Present in 2 other proteins
P16347	IAAS_WHEAT	Endogenous alpha-amylase/subtilisin inhibitor OS=Triticum aestivum	WASI			ADANYYVLPANR		AHGGGLTMAPGHGR	AHGGGLTMAPGHGR	Present in 15 other proteins (including barley and rice)
P16347	IAAS_WHEAT	Endogenous alpha-amylase/subtilisin inhibitor OS=Triticum aestivum	WASI		CPLFVSQEADGQR		CPLFVSQEADGQR	CPLFVSQEADGQR		Present in 5 other proteins
P16347	IAAS_WHEAT	Endogenous alpha-amylase/subtilisin inhibitor OS=Triticum aestivum	WASI						IAPHGGAPSDK	Present in 1 other protein
P16347	IAAS_WHEAT	Endogenous alpha-amylase/subtilisin inhibitor OS=Triticum aestivum	WASI			AYTTCVQSTEWHIDSELVSGR		AYTTCVQSTEWHIDSELVSGR		Present in 5 other proteins
P16347	IAAS_WHEAT	Endogenous alpha-amylase/subtilisin inhibitor OS=Triticum aestivum	WASI						RHVITGPVR	Present in 5 other proteins
P16347	IAAS_WHEAT	Endogenous alpha-amylase/subtilisin inhibitor OS=Triticum aestivum	WASI						HVITGPVRDPSPSGR	Present in 5 other proteins
P16347	IAAS_WHEAT	Endogenous alpha-amylase/subtilisin inhibitor OS=Triticum aestivum	WASI	HVITGPVR						No match
P16347	IAAS_WHEAT	Endogenous alpha-amylase/subtilisin inhibitor OS=Triticum aestivum	WASI	YSGAEVHEYK					YSGAEVHEYK	Present in barley and in 5 other proteins
P16347	IAAS_WHEAT	Endogenous alpha-amylase/subtilisin inhibitor OS=Triticum aestivum	WASI			LMACGDSCQDLGVFR		LMACGDSCQDLGVFR		Present in 5 other proteins
P16347	IAAS_WHEAT	Endogenous alpha-amylase/subtilisin inhibitor OS=Triticum aestivum	WASI			GGAWFLGATEPYHVVVFK		GGAWFLGATEPYHVVVFK	GGAWFLGATEPYHVVVFK	Present in barley and in 5 other proteins
P83207	ICIW2_Wheat	Chymotrypsin inhibitor WCI OS=Triticum aestivum	WCI	ELAAISSNCR		n.a.	ELAAISSNCR	ELAAISSNCR		Present in 2 other proteins
P83207	ICIW2_Wheat	Chymotrypsin inhibitor WCI OS=Triticum aestivum	WCI	AFPPSQSQGGGPPQPPLAPR	AFPPSQSQGGGPPQPPLAPR	n.a.	AFPPSQSQGGGPPQPPLAPR	AFPPSQSQGGGPPQPPLAPR	AFPPSQSQGGGPPQPPLAPR	Present in 2 other proteins
P83207	ICIW2_Wheat	Chymotrypsin inhibitor WCI OS=Triticum aestivum	WCI			n.a.	TLALPGQCNLPTIHGGPYCVFP	TLALPGQCNLPTIHGGPYCVFP		Present in 2 other proteins
*	-	Wheat Trypsin Inhibitor	WTI	ELEAVSEECR	n.a.	n.a.	ELEAVSEECR			unique
*	-	Wheat Trypsin Inhibitor	WTI		n.a.	n.a.	CTAMEDFMQGMLR			Present in 1 other protein
*	-	Wheat Trypsin Inhibitor	WTI	LEGVPEGCTR	n.a.	n.a.	LEGVPEGCTR			Present in 1 other protein
Q43723/Q43691	IACX1_WHEAT/IACX2_WHEAT	Trypsin/alpha-amylase inhibitor CMX1/CMX3/CMX2 OS=Triticum aestivum	CMx		QTCGYYLSAER	QTCGYYLSAER	QTCGYYLSAER	QTCGYYLSAER		Present in CMX1/3 and CMX2 and in 9 other proteins
Q43723/Q43691	IACX1_WHEAT/IACX2_WHEAT	Trypsin/alpha-amylase inhibitor CMX1/CMX3/CMX2 OS=Triticum aestivum	CMx	EFIAGIVGR	EFIAGIVGR	EFIAGIVGR	EFIAGIVGR	EFIAGIVGR	EFIAGIVGR	Present in CMX1/3 and CMX2 and in 2 other proteins
* Sequence according to Altenbach et al.19; similar to UniProtKB number			strikethrough peptides were not used for qunatification
A0A1D5UB33 (AAI domain-containing wheat protein), 70% identity
https://www.uniprot.org/uniprot/A0A1D5UB33

## Sheet: 1.2 Supplementary Table 2
		Absolute quantitation		Relative quantitation
	0	LC-MS/MS-TripleQuad-SRM (Abic)	LC-MS/MS-TripleQuad-SRM (TEP)	LC-MS/MS-IonTrap	LC-MS/MS-iTRAQ	LC-MS/MS-Orbitrap (iBAQ)	LC-MS/MS-Orbitrap (Skyline)	LC-MS/MS-QTOF
	Extraction	0.05 mmol/L Ammonium bicarbonate (Abic), pH 7.8)	0.5 mol/L Tris-HCl, pH 8.8, 1% DTT in 50% propanol
	Precipitation/Evaporation	Evaporation to dryness	cold acetone, 3x washing and centrifugation
	Reduction, Alkylation & Digestion	Resuspended in 0.5 mol/L Tris–HCl, pH 8.5 in 50% 1-propanol, reduction with TCEP and alkylation with chloroacetamide, evaporation to dryness, digestion with trypsin in 0.1 mol/L Tris-HCl, pH 7.8 overnight, evaporation to dryness		Resuspended in 8 mol/L urea and 0.1 mol/L Tris-HCl, pH 7.8, reduction with DTT, alkylation with iodoacetamide and digested with trypsin over night	Resuspension, reduction (TCEP), alkylation (iodoacetamide) and tryptic digestion according to the iTRAQ protocol (SCIEX, Darmstadt, Germany) and according to Kalunke et al. (2020)	Resuspended in 0.5 mol/L Tris–HCl, pH 8.5 in 50% 1-propanol, reduction with TCEP and alkylation with chloroacetamide, evaporation to dryness, digestion with trypsin in 0.1 mol/L Tris-HCl, pH 7.8 overnight		Resuspended in Rapigest solution, reduction with DTT, alkylation with iodoacetamide, digestion with trypsin
	Purification	-	-	-	Fractionation by high pH HPLC resulted in 12 fractions	Discovery DSC-C18-SPE		stage-tips
	Labeling/spike in	heavy isotopic labeled standards		-	iTRAQ 4 four-plex	-	-	-
	LC setup	Thermo UltiMate 3000 analytical-flow UHPLC system: C18 column 50 × 2 mm, 5 μm, 0.2 mL/min		Thermo UltiMate 3000 capillary-flow UHPLC system: HSS T3 C18 Column 300 µm × 150 mm, 1.8 µm, 6.0 µL/min	Thermo UltiMate 3000 nanoflow UHPLC system: PepMap 100 column, 75 µm × 150 mm, 2 µm, 300 nL/min	Thermo UltiMate 3000 nanoflow UHPLC system: bioZen C18 column, 75 µm × 250 mm, 2.6 µm, 300 nL/min		Waters H-class UPLC: CSH C18 column, 1 × 150 mm, 1.7 µm, 0.1 mL/min
	MS instrument & settings	TSQ Vantage		Bruker Amazon Speed IonTrap	Q Exactive HF	Q Exactive +		Xevo G2 XS QTOF
	Identification & Quantification	Targeted detection and absolute quantitation by stable isotope dilution analysis (SIDA)		MASCOT MS/MS Ions Search with “UniProt Taxonomy: Viridiplantae (Green plants)"; manually with Bruker Compass based on MS1 peak area of selected unique peptides	PEAKS X Pro software, fasta file containing only the target ATIs, quantitation using the Q modul within PEAKS based on unique peptides	Identification of peptides and proteins using MaxQuant with a fasta file containing all entries of Triticum aestium, enabeling the iBAQ algorithm, relative quantitation of the target ATIs	Identification of peptides and proteins using MaxQuant with a fasta file containing all entries of Triticum aestium, import this search in Sykline and evaluating only the 12 target ATIs using unique peptides	Identification of peptides and proteins using PLGS with a fasta file containing all reviewed entries of Triticum aestium plus the one for CM17 (totally 472 entries); only using the 12 target ATIs (except WTI) with specific peptides, after manuel remove of shared peptides

## Sheet: 1.3 Supplementary Table 3
Figure Caption	Method
Figure 2: Sum of Osborne fractions (left bar) and total extractable protein (right bar) of hexaploid (blue) and tetraploid samples (green). * significant difference between both extraction methods (t-test, p<0.05).	RP-HPLC-UV of intact proteins (2.2.1 and 2.2.2)
Figure 3: Quantitation of 12 ATIs by SIDA and LC-MS/MS after Abic (left bar) and TEP (right bar) extraction in hexaploid (blue) and tetraploid samples (green): a, 0.19; b, 0.28; c, 0.53; d, CM1; e, CM2; f, CM3; g, CM16; h, CM17; i, CMX1/2/3; j, WASI; k, WTI and l, WCI.	Absolute quantitation by LC-MS/MS and SIVA (2.3)
Figure 4: a, absolute ATI content as sum of 12 ATIs for Abic (left bar) and TEP (right bar) extractions; b, percentage ATI of Abic extraction (left bar) based on the sum of Osborne fractions and that of TEP extraction (right bar) based on the quantitation of intact proteins in the TEP extraction for hexaploid (blue) and tetraploid samples (green). With exception to the two bars of Svevo in a, all…	Absolute quantitation by LC-MS/MS and SIVA (2.3) and RP-HPLC-UV of intact proteins (2.2.1 and 2.2.2)
Figure 6: Relative comparison of 12 ATIs by means of absolute quantitation (SIDA), relative quantitation by IonTrap, iTRAQ and Orbitrap using Skyline and iBAQ: a, 0.19; b, 0.28; c, 0.53; d, CM1; e, CM2; f, CM3; g, CM16; h, CM17; i, CMX1/2/3; j, WASI; k, WTI and l, WCI.	Absolute (2.3) and relative quantitation (2.4) by LC-MS/MS

## Sheet: 1.4 Supplementary Table 4
		Protein content, Osborne (mg/g)		Protein content, TEP (mg/g)
Ploidy level	Sample	Mean	Standard deviation	Mean	Standard deviation
Hexaploid	Bobwhite	227.003	2.29873	225.092	0.59318
Hexaploid	22.2	237.923	0.81108	227.506	1.43715
Hexaploid	10-10a	244.148	2.09574	224.254	3.33461
Hexaploid	24-1-1	235.874	2.94487	221.297	0.8275
Tetraploid	Svevo	95.6216	1.02937	105.295	9.01202
Tetraploid	R5P8b	175.63	3.38326	165.984	6.54155
Tetraploid	R2P8c	174.071	4.84836	168.172	6.77344
T-tests
Sample	Factor 1	Factor 2	p	significant
Bobwhite	Osborne	TEP	0.28422	no
22.2	Osborne	TEP	0.0013	yes
10-10a	Osborne	TEP	0.00198	yes
24-1-1	Osborne	TEP	0.00915	yes
Svevo	Osborne	TEP	0.20278	no
R5P8b	Osborne	TEP	0.1081	no
R2P8c	Osborne	TEP	0.29367	no

## Sheet: 1.5 Supplementary Table 5
0.19		Abic (µg/g)		TEP (µg/g)		0.28		Abic (µg/g)		TEP (µg/g)		0.53		Abic (µg/g)		TEP (µg/g)
Ploidy level	Sample	Mean	Standard deviation	Mean	Standard deviation	Ploidy level	Sample	Mean	Standard deviation	Mean	Standard deviation	Ploidy level	Sample	Mean	Standard deviation	Mean	Standard deviation
Hexaploid	Bobwhite	368.765	6.18095	221.414	36.6082	Hexaploid	Bobwhite	231.388	7.00492	213.135	7.10822	Hexaploid	Bobwhite	243.272	8.84257	102.136	4.70348
Hexaploid	22.2	371.015	4.57002	141.088	17.1158	Hexaploid	22.2	n.d.		n.d.		Hexaploid	22.2	136.319	0.67718	56.8695	4.49773
Hexaploid	10-10a	324.011	30.874	139.033	2.83069	Hexaploid	10-10a	n.d.		n.d.		Hexaploid	10-10a	138.19	7.66438	50.3822	8.81098
Hexaploid	24-1-1	383.134	26.5793	160.204	7.75871	Hexaploid	24-1-1	n.d.		n.d.		Hexaploid	24-1-1	135.382	16.2873	51.9971	2.46271
Tetraploid	Svevo	n.d.		n.d.		Tetraploid	Svevo	154.629	30.3644	150.452	4.97676	Tetraploid	Svevo	284.243	36.7337	183.349	26.3117
Tetraploid	R5P8b	n.d.		n.d.		Tetraploid	R5P8b	168.078	4.55602	156.59	1.76595	Tetraploid	R5P8b	459.219	4.53402	166.952	12.9485
Tetraploid	R2P8c	n.d.		n.d.		Tetraploid	R2P8c	169.141	7.31243	150.758	6.24376	Tetraploid	R2P8c	466.154	41.4215	170.816	3.98997
CM1		Abic (µg/g)		TEP (µg/g)		CM2		Abic (µg/g)		TEP (µg/g)		CM3		Abic (µg/g)		TEP (µg/g)
Ploidy level	Sample	Mean	Standard deviation	Mean	Standard deviation	Ploidy level	Sample	Mean	Standard deviation	Mean	Standard deviation	Ploidy level	Sample	Mean	Standard deviation	Mean	Standard deviation
Hexaploid	Bobwhite	98.0956	1.59262	44.5857	4.88798	Hexaploid	Bobwhite	159.248	3.22665	124.978	2.45478	Hexaploid	Bobwhite	323.659	4.63339	175.206	12.4323
Hexaploid	22.2	n.d.		n.d.		Hexaploid	22.2	n.d.		n.d.		Hexaploid	22.2	17.7522	1.02302	18.1122	0.36055
Hexaploid	10-10a	n.d.		n.d.		Hexaploid	10-10a	n.d.		n.d.		Hexaploid	10-10a	10.1552	1.37028	14.706	0.37523
Hexaploid	24-1-1	n.d.		n.d.		Hexaploid	24-1-1	n.d.		n.d.		Hexaploid	24-1-1	10.2653	1.10419	15.0032	0.62584
Tetraploid	Svevo	n.d.		n.d.		Tetraploid	Svevo	224.513	20.2478	209.367	18.04	Tetraploid	Svevo	534.885	79.8117	330.496	93.5646
Tetraploid	R5P8b	n.d.		n.d.		Tetraploid	R5P8b	270.558	13.98	215.032	9.82729	Tetraploid	R5P8b	n.d.		n.d.
Tetraploid	R2P8c	n.d.		n.d.		Tetraploid	R2P8c	194.616	12.0414	160.525	3.36599	Tetraploid	R2P8c	n.d.		n.d.
CM16		Abic (µg/g)		TEP (µg/g)		CM17		Abic (µg/g)		TEP (µg/g)		CMX1/2/3		Abic (µg/g)		TEP (µg/g)
Ploidy level	Sample	Mean	Standard deviation	Mean	Standard deviation	Ploidy level	Sample	Mean	Standard deviation	Mean	Standard deviation	Ploidy level	Sample	Mean	Standard deviation	Mean	Standard deviation
Hexaploid	Bobwhite	230.265	8.2593	235.054	5.61835	Hexaploid	Bobwhite	261.6	3.01968	262.728	9.27072	Hexaploid	Bobwhite	113.58	3.55499	75.1399	9.40476
Hexaploid	22.2	n.d.		n.d.		Hexaploid	22.2	18.0521	0.99531	20.9822	1.79446	Hexaploid	22.2	152.41	1.96605	77.6095	7.72595
Hexaploid	10-10a	n.d.		n.d.		Hexaploid	10-10a	15.2974	0.27263	19.2746	1.21656	Hexaploid	10-10a	118.398	6.97266	73.6013	9.76462
Hexaploid	24-1-1	n.d.		n.d.		Hexaploid	24-1-1	n.d.		n.d.		Hexaploid	24-1-1	145.071	4.41651	81.6639	3.2121
Tetraploid	Svevo	415.808	46.5153	463.299	23.4472	Tetraploid	Svevo	n.d.		n.d.		Tetraploid	Svevo	183.656	28.0042	99.5354	25.6714
Tetraploid	R5P8b	n.d.		n.d.		Tetraploid	R5P8b	n.d.		n.d.		Tetraploid	R5P8b	161.497	11.3847	104.848	2.54183
Tetraploid	R2P8c	n.d.		n.d.		Tetraploid	R2P8c	n.d.		n.d.		Tetraploid	R2P8c	154.313	12.1237	85.378	7.14399
WASI		Abic (µg/g)		TEP (µg/g)		WTI		Abic (µg/g)		TEP (µg/g)		WCI		Abic (µg/g)		TEP (µg/g)
Ploidy level	Sample	Mean	Standard deviation	Mean	Standard deviation	Ploidy level	Sample	Mean	Standard deviation	Mean	Standard deviation	Ploidy level	Sample	Mean	Standard deviation	Mean	Standard deviation
Hexaploid	Bobwhite	58.2955	2.74058	15.427	2.88231	Hexaploid	Bobwhite	54.3995	3.4295	45.6515	1.98339	Hexaploid	Bobwhite	70.8091	5.92048	144.275	5.64164
Hexaploid	22.2	77.2186	7.3066	14.6629	0.87104	Hexaploid	22.2	33.2574	2.9012	22.266	1.59842	Hexaploid	22.2	80.6708	10.4946	158.38	10.1689
Hexaploid	10-10a	84.7895	11.9457	19.7001	1.53137	Hexaploid	10-10a	31.0694	1.53505	22.0217	0.39151	Hexaploid	10-10a	74.3772	10.7692	144.123	20.7202
Hexaploid	24-1-1	76.4312	7.74879	15.5918	0.53218	Hexaploid	24-1-1	27.9343	2.74682	22.3345	0.62227	Hexaploid	24-1-1	71.7934	5.61571	159.317	10.8615
Tetraploid	Svevo	41.6668	6.69494	8.46022	0.8969	Tetraploid	Svevo	60.7706	7.9728	53.3222	2.69293	Tetraploid	Svevo	n.d.		n.d.
Tetraploid	R5P8b	77.5661	7.23485	10.5275	0.78286	Tetraploid	R5P8b	40.3254	5.9276	29.86	3.29668	Tetraploid	R5P8b	n.d.		n.d.
Tetraploid	R2P8c	50.0789	4.11482	n.d.		Tetraploid	R2P8c	38.6323	2.43981	26.8354	2.18465	Tetraploid	R2P8c	n.d.		n.d.

## Sheet: 1.6 Supplementary Table 6
Absolute		Abic (µg/g)		TEP (µg/g)		Percentage		Abic (µg/g)		TEP (µg/g)
Ploidy level	Sample	Mean	Standard deviation	Mean	Standard deviation	Ploidy level	Sample	Mean	Standard deviation	Mean	Standard deviation
Hexaploid	Bobwhite	2.21338	0.01835	1.61408	0.08275	Hexaploid	Bobwhite	0.97506	0.00808	0.73736	0.0361
Hexaploid	22.2	0.89529	0.01787	0.4877	0.03905	Hexaploid	22.2	0.37269	0.00764	0.22416	0.01724
Hexaploid	10-10a	0.79629	0.06621	0.46082	0.04123	Hexaploid	10-10a	0.34815	0.02493	0.21531	0.01855
Hexaploid	24-1-1	0.85001	0.06088	0.50611	0.00823	Hexaploid	24-1-1	0.3376	0.02807	0.2287	0.00372
Tetraploid	Svevo	1.91301	0.24424	1.44496	0.17668	Tetraploid	Svevo	1.98721	0.25238	1.42294	0.16556
Tetraploid	R5P8b	1.07294	0.07404	0.56748	0.01399	Tetraploid	R5P8b	0.61091	0.04216	0.41516	0.01288
Tetraploid	R2P8c	1.17724	0.03211	0.68381	0.02186	Tetraploid	R2P8c	0.67631	0.01845	0.36025	0.00897
ANOVA						ANOVA
Absolute, Abic						Percentage, Abic
Factor 1	Factor 2	p	significant			Factor 1	Factor 2	p	significant
Bobwhite	22.2	3.43577e-07	yes			Bobwhite	22.2	4.52818e-05	yes
Bobwhite	10-10a	9.33395e-07	yes			Bobwhite	10-10a	2.37848e-05	yes
Bobwhite	24-1-1	3.55227e-07	yes			Bobwhite	24-1-1	2.88007e-05	yes
22.2	10-10a	0.92394	no			22.2	10-10a	0.99925	no
22.2	24-1-1	0.99925	no			22.2	24-1-1	0.9999	no
10-10a	24-1-1	0.99389	no			10-10a	24-1-1	1	no
Svevo	R5P8b	9.09504e-06	yes			Svevo	R5P8b	8.9701e-07	yes
Svevo	R2P8c	1.7419e-06	yes			Svevo	R2P8c	2.29943e-06	yes
R5P8b	R2P8c	0.8643	no			R5P8b	R2P8c	0.99217	no
ANOVA						ANOVA
Absolute, TEP						Percentage, TEP
Factor 1	Factor 2	p	significant			Factor 1	Factor 2	p	significant
Bobwhite	22.2	3.90654e-06	yes			Bobwhite	22.2	2.32336e-06	yes
Bobwhite	10-10a	4.19587e-08	yes			Bobwhite	10-10a	1.87378e-06	yes
Bobwhite	24-1-1	4.23855e-08	yes			Bobwhite	24-1-1	2.59682e-06	yes
22.2	10-10a	0.99929	no			22.2	10-10a	1	no
22.2	24-1-1	1	no			22.2	24-1-1	1	no
10-10a	24-1-1	0.99971	no			10-10a	24-1-1	0.99997	no
Svevo	R5P8b	5.81597e-08	yes			Svevo	R5P8b	4.17905e-08	yes
Svevo	R2P8c	1.18391e-07	yes			Svevo	R2P8c	4.05329e-08	yes
R5P8b	R2P8c	0.82642	no			R5P8b	R2P8c	0.93712	no

## Sheet: 1.7 Supplementary Table 7
Absolute Quantification
TEP	0.19	0.28	0.53	CM1	CM2	CM3	CM16	CM17	CMX	WASI	WTI	WCI
Svevo	n.d.	1	1	n.d.	1	1	1	n.d.	1	1	1	n.d.
R5P8b	n.d.	1.04079	0.910571	n.d.	1.02705	0.00133133	0.016512	n.d.	1.05338	1.24435	0.559993	n.d.
Bobwhite	1	1	1	1	1	1	1	1	1	1	1	1
22-2.	0.637216	n.d.	0.556802	n.d.	n.d.	0.103377	n.d.	0.0798628	1.03287	0.950472	0.487738	1.09777
Relative Quantitation
IonTrap	0.19	0.28	0.53	CM1	CM2	CM3	CM16	CM17	CMX	WASI	WTI	WCI
Svevo	n.d.	1	1	n.d.	1	1	1	1	1	1	n.d.	1
R5P8b	n.d.	0.554	0.905	n.d.	0.624	0.017	0.057	0.641	0.643	1.016	n.d.	0.945
Bobwhite	1	1	1	1	1	1	1	1	1	1	n.d.	1
22-2.	1.05	0.0844	0.608	n.d.	0.1927	0.078	0.2147	0.218	1.099	1.135	n.d.	0.976
iTRAQ	0.19	0.28	0.53	CM1	CM2	CM3	CM16	CM17	CMX	WASI	WTI	WCI
Svevo	1	1	n.d.	1	1	1	1	n.d.	1	1	n.d.	n.d.
R5P8b	1.31	0.58	n.d.	0.65	0.75	0.08	0.07	n.d.	0.59	0.84	n.d.	n.d.
Bobwhite	1	1	n.d.	1	1	1	1	1	1	1	n.d.	1
22-2.	0.99	0.17	n.d.	0.39	0.33	0.16	0.11	0.15	1.12	1.1	n.d.	1.19
Skyline	0.19	0.28	0.53	CM1	CM2	CM3	CM16	CM17	CMX	WASI	WTI	WCI
Svevo	1	1	1	n.d.	1	1	1	n.d.	1	1	1	n.d.
R5P8b	n.d.	0.71	n.d.	n.d.	0.69	n.d.	n.d.	n.d.	0.77	0.86	0.2	n.d.
Bobwhite	1	1	1	1	1	1	1	1	1	1	1	1
22-2.	0.58	0.07	n.d.	n.d.	n.d.	0.08	0.03	0.05	1.48	1.31	0.55	1.08
iBAQ	0.19	0.28	0.53	CM1	CM2	CM3	CM16	CM17	CMX	WASI	WTI	WCI
Svevo	n.d.	1	n.d.	n.d.	1	1	1	1	1	1	1	n.d.
R5P8b	n.d.	0.939352	n.d.	n.d.	0.900377	n.d.	n.d.	n.d.	1.07284	0.93244	0.276218	n.d.
Bobwhite	n.d.	1	1	1	1	1	1	1	1	1	1	1
22-2.	n.d.	0.0992322	0.940653	0.0915897	0.0563592	0.0808834	0.0518017	0.0768656	2.0931	1.77092	0.773351	1.78503
DIA	0.19	0.28	0.53	CM1	CM2	CM3	CM16	CM17	CMX	WASI	WTI	WCI
Svevo	n.d.	1	1	n.d.	1	1	1	n.d.	n.d.	1	n.d.	n.d.
R5P8b	n.d.	0.62	0.9	n.d.	0.65	n.d.	n.d.	n.d.	n.d.	0.87	n.d.	n.d.
Bobwhite	1	1	1	1	1	1	1	1	n.d.	1	n.d.	n.d.
22-2.	0.72	0.04	0.59	n.d.	n.d.	0.02	n.d.	n.d.	n.d.	1.35	n.d.	n.d.
